# Supplementary material
Source: PubMed Central journal article supplement (PMC9764991)
Supplement: jb.00279-22-s0001.pdf [file jb.00279-22-s0001.pdf]

1 SUPPLEMENTAL MATERIAL

2

A

|                       | Type I                          | Type II       | Type III                      |
|-----------------------|---------------------------------|---------------|-------------------------------|
|                       |                                 |               |                               |
| Restriction Machinery | R <sub>2</sub> M <sub>2</sub> S | RE            | R <sub>2</sub> M <sub>2</sub> |
| Methylation Machinery | M <sub>2</sub> S                | MT            | M <sub>2</sub>                |
| Cleavage site         | Variable                        | Fixed         | Variable                      |
| Nucleobase            | 6mA                             | 6mA, 5mC, 4mC | 6mA, 4mC                      |

B

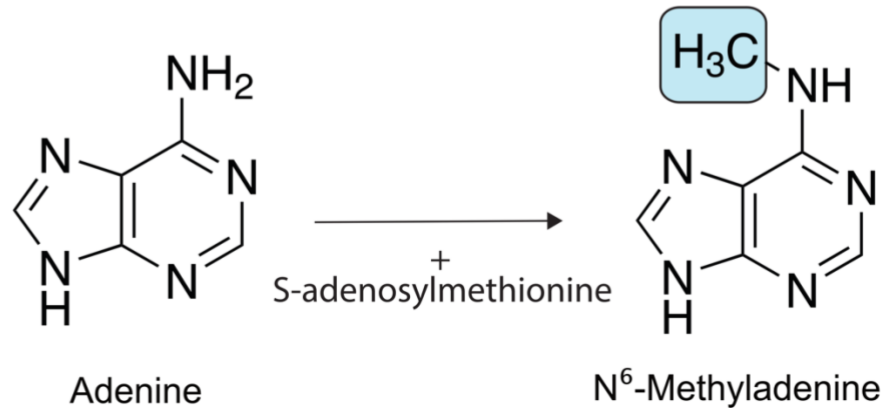

3

4

5 **Figure S1. R-M systems and DNA methylation. (A)** R-M systems are classified as Type I, Type II, and Type III according to

6 their molecular structure, subunit composition, cleavage position, restriction site, and cofactor specification. **(B)** Nearly all

7 methylation in *Fusobacterium* is predicted to be on adenine or adenosine residues within DNA and is added to nitrogen at the 6<sup>th</sup>

8 position to create N6-Methyladenine (N<sup>6</sup>-mA or <sup>6</sup>mA).

9

10

**Table S1. *Fusobacterium nucleatum* (Fn) R-M system analysis in 25 strains.**

| Fn Strain                                                            | # Type I | # Type II<br>Brex | # Type II | # Type III | # Type IV | Rebase Organism<br>Number and link to<br>strain analysis |
|----------------------------------------------------------------------|----------|-------------------|-----------|------------|-----------|----------------------------------------------------------|
| <i>Fusobacterium nucleatum</i><br>subsp. <i>nucleatum</i> ATCC 25586 | 0        | 0                 | 3         | 1          | 0         | 28619 - <a href="#">Link</a>                             |
| <i>Fusobacterium nucleatum</i><br>subsp. <i>nucleatum</i> ATCC 23726 | 1        | 1                 | 2         | 0          | 0         | 28620 - <a href="#">Link</a>                             |
| <i>Fusobacterium nucleatum</i><br>subsp. <i>nucleatum</i> ChDC F316  | 2        | 0                 | 3         | 2          | 0         | 11922 - <a href="#">Link</a>                             |
| <i>Fusobacterium nucleatum</i><br>subsp. <i>nucleatum</i> ChDC F317  | 2        | 0                 | 3         | 2          | 0         | 25130 - <a href="#">Link</a>                             |

|                                                                          |   |   |   |   |   |                              |
|--------------------------------------------------------------------------|---|---|---|---|---|------------------------------|
| <i>Fusobacterium nucleatum</i><br>subsp. <i>nucleatum</i> KCOM 1250      | 0 | 1 | 4 | 2 | 0 | 17057 - <a href="#">Link</a> |
| <i>Fusobacterium nucleatum</i><br>subsp. <i>animalis</i> 7_1             | 2 | 1 | 8 | 0 | 0 | 12464 - <a href="#">Link</a> |
| <i>Fusobacterium nucleatum</i><br>subsp. <i>animalis</i> ChDC F324       | 1 | 1 | 5 | 0 | 0 | 11921 - <a href="#">Link</a> |
| <i>Fusobacterium nucleatum</i><br>subsp. <i>animalis</i> ChDC F332       | 2 | 1 | 3 | 0 | 1 | 25138 - <a href="#">Link</a> |
| <i>Fusobacterium nucleatum</i><br>subsp. <i>animalis</i> KCOM 1325       | 1 | 1 | 4 | 0 | 1 | 17056 - <a href="#">Link</a> |
| <i>Fusobacterium nucleatum</i><br>subsp. <i>animalis</i> THCT5A4         | 1 | 2 | 4 | 0 | 3 | 50803 - <a href="#">Link</a> |
| <i>Fusobacterium nucleatum</i><br>subsp. <i>animalis</i> THCT6B3         | 0 | 1 | 5 | 0 | 2 | 50804 - <a href="#">Link</a> |
| <i>Fusobacterium nucleatum</i><br>subsp. <i>animalis</i> THCT7A2         | 1 | 1 | 2 | 1 | 2 | 50805 - <a href="#">Link</a> |
| <i>Fusobacterium nucleatum</i><br>subsp. <i>vincentii</i> 3_1_27         | 2 | 1 | 4 | 0 | 0 | 12221 - <a href="#">Link</a> |
| <i>Fusobacterium nucleatum</i><br>subsp. <i>vincentii</i> 3_1_36A2       | 2 | 1 | 1 | 1 | 0 | 11159 - <a href="#">Link</a> |
| <i>Fusobacterium nucleatum</i><br>subsp. <i>vincentii</i> ATCC 49256     | 2 | 0 | 2 | 2 | 0 | 3870 - <a href="#">Link</a>  |
| <i>Fusobacterium nucleatum</i><br>subsp. <i>vincentii</i> ChDC F8        | 1 | 0 | 2 | 2 | 1 | 11920 - <a href="#">Link</a> |
| <i>Fusobacterium nucleatum</i><br>subsp. <i>vincentii</i> KCOM 2931      | 3 | 0 | 2 | 0 | 2 | 26587 - <a href="#">Link</a> |
| <i>Fusobacterium nucleatum</i><br>subsp. <i>vincentii</i> NCTC11326      | 1 | 2 | 2 | 0 | 0 | 43544 - <a href="#">Link</a> |
| <i>Fusobacterium nucleatum</i><br>subsp. <i>vincentii</i> THCT14A3       | 3 | 1 | 2 | 0 | 2 | 50808 - <a href="#">Link</a> |
| <i>Fusobacterium nucleatum</i><br>subsp. <i>polymorphum</i> 10953        | 2 | 0 | 4 | 0 | 0 | 5408 - <a href="#">Link</a>  |
| <i>Fusobacterium nucleatum</i><br>subsp. <i>polymorphum</i> ChDC<br>F306 | 2 | 1 | 4 | 0 | 1 | 17423 - <a href="#">Link</a> |
| <i>Fusobacterium nucleatum</i><br>subsp. <i>polymorphum</i> ChDC<br>F319 | 2 | 1 | 3 | 0 | 1 | 17492 - <a href="#">Link</a> |
| <i>Fusobacterium nucleatum</i><br>subsp. <i>polymorphum</i> KCOM<br>1275 | 2 | 0 | 3 | 1 | 0 | 25139 - <a href="#">Link</a> |
| <i>Fusobacterium nucleatum</i><br>subsp. <i>polymorphum</i><br>THCT15E1  | 2 | 1 | 3 | 0 | 3 | 50806 - <a href="#">Link</a> |
| <i>Fusobacterium nucleatum</i><br>subsp. <i>polymorphum</i> THCT7E2      | 1 | 1 | 4 | 2 | 2 | 50807 - <a href="#">Link</a> |

11  
12  
13

**Table S2. *Fusobacterium nucleatum* (*Fn*) DNA methyltransferases (MTases) analyzed in this study from Figure 4**

| Name      | <i>Fn</i> Strain                                          | NCBI ID    | MTase Type | REBASE Predicted Recognition and Methylation site | Link to REBASE classification of the MTase |
|-----------|-----------------------------------------------------------|------------|------------|---------------------------------------------------|--------------------------------------------|
| M.Fnn23.l | <i>F. nucleatum</i> subsp. <i>nucleatum</i><br>ATCC 23726 | AVQ22737.1 | II         | CATG                                              | <a href="#">M.Fnu23726SORF3380P</a>        |

|              |                                                           |            |     |                                |                                     |
|--------------|-----------------------------------------------------------|------------|-----|--------------------------------|-------------------------------------|
| M.Fnn23.II   | <i>F. nucleatum</i> subsp. <i>nucleatum</i><br>ATCC 23726 | AVQ22751.1 | II  | GCATC                          | <a href="#">M.Fnu23726SORF3460P</a> |
| M.Fnn25.I    | <i>F. nucleatum</i> subsp. <i>nucleatum</i><br>ATCC 25586 | AVQ15832.1 | II  | CCNNNNNNNGG                    | <a href="#">M.Fnu25586ORF2505P</a>  |
| M.Fnn25.II   | <i>F. nucleatum</i> subsp. <i>nucleatum</i><br>ATCC 25586 | AVQ14558.1 | II  | CATG                           | <a href="#">M.Fnu25586ORF3175P</a>  |
| M.Fnn25.III  | <i>F. nucleatum</i> subsp. <i>nucleatum</i><br>ATCC 25586 | AVQ14569.1 | II  | GCATC                          | <a href="#">M.Fnu25586ORF3235P</a>  |
| M.Fnn25.IV   | <i>F. nucleatum</i> subsp. <i>nucleatum</i><br>ATCC 25586 | AVQ14879.1 | III | GCATT                          | <a href="#">M1.Fnu25586ORF5130P</a> |
| M.Fnn25.V    | <i>F. nucleatum</i> subsp. <i>nucleatum</i><br>ATCC 25586 | AVQ15904.1 | III | GCATT                          | <a href="#">M2.Fnu25586ORF5130P</a> |
| M.Fna48.I    | <i>F. nucleatum</i> subsp. <i>animalis</i> 4_8            | AGM22521.1 | II  | GANTC                          | <a href="#">M.Fsp48ORF1891P</a>     |
| M.Fna48.II   | <i>F. nucleatum</i> subsp. <i>animalis</i> 4_8            | AGM23250.1 | II  | CTNNAG                         | <a href="#">M.Fsp48ORF934P</a>      |
| M.Fna48.III  | <i>F. nucleatum</i> subsp. <i>animalis</i> 4_8            | AGM23714.1 | III | GGCAS S=C/G                    | <a href="#">M.Fsp48ORF464P</a>      |
| M.Fna71.I    | <i>F. nucleatum</i> subsp. <i>animalis</i> 7_1            | EEO43724.1 | II  | GANTC                          | <a href="#">M.Fnu71ORF2283P</a>     |
| M.Fna71.II   | <i>F. nucleatum</i> subsp. <i>animalis</i> 7_1            | EEO42819.1 | II  | GATC                           | <a href="#">M.Fnu71ORF1378P</a>     |
| M.Fna71.III  | <i>F. nucleatum</i> subsp. <i>animalis</i> 7_1            | EEO42817.1 | II  | GATC                           | <a href="#">M.Fnu71ORF1376P</a>     |
| M.Fna71.IV   | <i>F. nucleatum</i> subsp. <i>animalis</i> 7_1            | EEO42604.1 | II  | CATG                           | <a href="#">M.Fnu71ORF1163P</a>     |
| M.Fna71.V    | <i>F. nucleatum</i> subsp. <i>animalis</i> 7_1            | EEO42568.1 | II  | GANTC                          | <a href="#">M.Fnu71ORF1127P</a>     |
| M.Fna71.VI   | <i>F. nucleatum</i> subsp. <i>animalis</i> 7_1            | EEO42208.1 | II  | GANTC                          | <a href="#">M.Fnu71ORF767P</a>      |
| M.Fna71.VII  | <i>F. nucleatum</i> subsp. <i>animalis</i> 7_1            | EEO43273.1 | II  | GCATC                          | <a href="#">M.Fnu71ORF1832P</a>     |
| M.Fna71.VIII | <i>F. nucleatum</i> subsp. <i>animalis</i> 7_1            | EEO43020.1 | II  | GCATC                          | <a href="#">M.Fnu71ORF1579P</a>     |
| M.Fna71.IX   | <i>F. nucleatum</i> subsp. <i>animalis</i> 7_1            | EEO43011.1 | II  | No Prediction                  | <a href="#">M.Fnu71ORF1570P</a>     |
| M.Fnp10.I    | <i>F. nucleatum</i> subsp. <i>polymorphum</i> 10953       | EDK87839.1 | II  | GATC                           | <a href="#">M.FnuPORF20P</a>        |
| M.Fnp10.II   | <i>F. nucleatum</i> subsp. <i>polymorphum</i> 10953       | EDK87614.1 | II  | GCATC                          | <a href="#">M.FnuPORF2222P</a>      |
| M.Fnp10.III  | <i>F. nucleatum</i> subsp. <i>polymorphum</i> 10953       | EDK88996.1 | II  | CCWGG (C <sup>5</sup> ). W=A/T | <a href="#">M.FnuPORF1209P</a>      |
| M.Fnp10.IV   | <i>F. nucleatum</i> subsp. <i>polymorphum</i> 10953       | EDK89489.1 | II  | ATGCAT                         | <a href="#">M.FnuPORF1716P</a>      |

14  
15

**Table S3. Plasmids used in this study**

| Plasmid Name | Description                                                                                                                                                                                                   | Source or Reference                  |
|--------------|---------------------------------------------------------------------------------------------------------------------------------------------------------------------------------------------------------------|--------------------------------------|
| pDJSVT7      | Vector containing a <i>FLAG:galk</i> gene to make double crossover gene deletions in a $\Delta galkT$ background. (Cm <sup>r</sup> Tm <sup>r</sup> )                                                          | <i>Casasanta et al.</i> <sup>1</sup> |
| pDJSVT11     | Chromosomal complementation vector for <i>F. nucleatum</i> 23726 and 25586. Incorporates a plasmid within the chromosomal <i>arsB</i> gene using homologous recombination. (Cm <sup>r</sup> Tm <sup>r</sup> ) | <i>Casasanta et al.</i> <sup>1</sup> |
| pDJSVT13     | Vector containing homologous regions +/- 1000 bp upstream and downstream of <i>galkT</i> for single crossover Integration in <i>F. nucleatum</i> 23726 and 25586 (Cm <sup>r</sup> , Tm <sup>r</sup> )         | <i>Casasanta et al.</i> <sup>1</sup> |
| pDJSVT21     | pDJSVT13 with all of the CATG sites silently mutated. (Cm <sup>r</sup> , Tm <sup>r</sup> )                                                                                                                    | This study                           |

|           |                                                                                                                                                                                                                                                          |                                     |
|-----------|----------------------------------------------------------------------------------------------------------------------------------------------------------------------------------------------------------------------------------------------------------|-------------------------------------|
| pDJSVT24  | pET16b vector containing <i>m.fnn23.I</i> gene under a constitutive promoter. (Amp <sup>r</sup> )                                                                                                                                                        | This study                          |
| pDJSVT25  | pET16b vector containing <i>m.fnn23.II</i> gene under a constitutive promoter. (Amp <sup>r</sup> )                                                                                                                                                       | This study                          |
| pDJSVT26  | pET16b vector containing the <i>m.fnn23.I</i> and <i>m.fnn23.II</i> genes under independent constitutive promoters. (Amp <sup>r</sup> )                                                                                                                  | This study                          |
| pDJSVT27  | pET16b vector containing <i>m.fnn23.I</i> gene with a 6xHis tag. Under an IPTG inducible promoter for recombinant protein expression and purification. (Amp <sup>r</sup> )                                                                               | This study                          |
| pDJSVT28  | pET16b vector containing <i>m.fnn23.II</i> gene with a 6xHis tag. Under an IPTG inducible promoter for recombinant protein expression and purification. (Amp <sup>r</sup> )                                                                              | This study                          |
| pDJSVT29  | pET16b vector containing <i>m.fnn25.I</i> gene with a 6xHis tag. Under an IPTG inducible promoter for recombinant protein expression and purification. (Amp <sup>r</sup> )                                                                               | This study                          |
| pDJSVT30  | pET16b vector containing <i>m.fnn25.IV</i> gene with a 6xHis tag. Under an IPTG inducible promoter for recombinant protein expression and purification. (Amp <sup>r</sup> )                                                                              | This study                          |
| pDJSVT31  | pET16b vector containing <i>m.fnn25.V</i> gene with a 6xHis tag. Under an IPTG inducible promoter for recombinant protein expression and purification. (Amp <sup>r</sup> )                                                                               | This study                          |
| pTNVT2501 | <i>fap2</i> gene deletion vector for <i>F. nucleatum</i> 25586 (Cm <sup>r</sup> Tm <sup>r</sup> )                                                                                                                                                        | This study                          |
| pTNVT2502 | <i>fadA</i> gene deletion vector for <i>F. nucleatum</i> 25586 (Cm <sup>r</sup> Tm <sup>r</sup> )                                                                                                                                                        | This study                          |
| pDJSVT32  | Chromosomal complementation vector for <i>fadA-FLAG F. nucleatum</i> 25586 $\Delta$ <i>galKT fadA</i> . Incorporates a plasmid within the chromosomal <i>arsB</i> gene expressing <i>fadA-FLAG</i> to complement strain TNVT2503 to make strain TNVT2508 | This study                          |
| pET16b    | IPTG inducible express vector. pDB322 origin of replication. (Amp <sup>r</sup> )                                                                                                                                                                         | EMD Millipore                       |
| pHS30     | Fusobacterium multicopy, episomal pFN-1 based shuttle plasmid                                                                                                                                                                                            | Kinder Haake et al. <sup>2</sup>    |
| pBAMD1-4  | Standardized mini-Tn5 delivery plasmid for transposon mutagenesis. Streptomycin/spectinomycin resistant                                                                                                                                                  | Martinez-Garcia et al. <sup>3</sup> |

16 Cm<sup>r</sup>, Chloramphenicol resistance Tm<sup>r</sup>, Thiamphenicol resistance. Amp<sup>r</sup>, Ampicillin resistance

17

18

**Table S4. Bacterial strains used in this study**

| Strain                                                 | Bacterial Species   | Genotype and Characteristics                                                                                                                                                                                                                                                                                             | Source or Reference                |
|--------------------------------------------------------|---------------------|--------------------------------------------------------------------------------------------------------------------------------------------------------------------------------------------------------------------------------------------------------------------------------------------------------------------------|------------------------------------|
| TOP10                                                  | <i>E. coli</i>      | <i>mcrA</i> , $\Delta$ ( <i>mrr-hsdRMS-mcrBC</i> ), <i>Phi80(del)M15</i> , $\Delta$ <i>lacX74</i> , <i>deoR</i> , <i>recA1</i> , <i>araD139</i> , $\Delta$ ( <i>ara-leu</i> )7697, <i>galU</i> , <i>galK</i> , <i>rpsL</i> ( <i>SmR</i> ), <i>endA1</i> , <i>nupG</i>                                                    | Invitrogen                         |
| ArcticExpress (DE3) RIL                                | <i>E. coli</i>      | B F- <i>ompT endA Hte</i> [ <i>cpn10 cpn60 Gentr</i> ] <i>hsdS(r8-m8)</i> <i>dcm+</i> <i>Tetr galX</i> (DE3) [ <i>argU ileY leuW Strr</i> ]                                                                                                                                                                              | Agilent                            |
| LOBSTR-BL21(DE3)-RIL                                   | <i>E. coli</i>      | F- <i>ompT hsdSB</i> ( <i>rB- mB-</i> ) <i>dcm gal</i> (DE3)                                                                                                                                                                                                                                                             | Anderson et al. <sup>4</sup>       |
| ER2796                                                 | <i>E. coli</i>      | F- <i>fhuA2::IS2</i> , <i>glnX44(AS)</i> , $\lambda$ , <i>e14-</i> , <i>trp-31</i> , <i>dcm-6</i> , <i>yedZ3069::Tn10</i> , <i>hisG1</i> , <i>argG6</i> , <i>rpsL104</i> , $\Delta$ <i>dam-16::KanR</i> , <i>xyl-7</i> , <i>mtlA2</i> , <i>metB1</i> , $\Delta$ ( <i>mcrC-mrr</i> )114: <i>IS10</i> Methylation negative | Anton et al. <sup>5</sup>          |
| <i>F. nucleatum</i> subsp. <i>nucleatum</i> ATCC 23726 | <i>F. nucleatum</i> | Wild Type                                                                                                                                                                                                                                                                                                                | ATCC                               |
| <i>F. nucleatum</i> subsp. <i>nucleatum</i> ATCC 25586 | <i>F. nucleatum</i> | Wild Type                                                                                                                                                                                                                                                                                                                | ATCC                               |
| <i>F. nucleatum</i> subsp. <i>animalis</i> 4_8         | <i>F. nucleatum</i> | Wild Type                                                                                                                                                                                                                                                                                                                | Manson McGuire et al. <sup>6</sup> |
| <i>F. nucleatum</i> subsp. <i>animalis</i> 7_1         | <i>F. nucleatum</i> | Wild Type                                                                                                                                                                                                                                                                                                                | Manson McGuire et al. <sup>6</sup> |
| <i>F. nucleatum</i> subsp. <i>polymorphum</i> 10953    | <i>F. nucleatum</i> | Wild Type                                                                                                                                                                                                                                                                                                                | Manson McGuire et al. <sup>6</sup> |
| TNVT2501                                               | <i>F. nucleatum</i> | <i>F. nucleatum</i> 25586 $\Delta$ <i>galKT</i> In-frame deletion of <i>galK</i> and <i>galT</i> genes (Base strain for all target in-frame gene deletions in <i>F. nucleatum</i> 25586)                                                                                                                                 | This study                         |
| TNVT2502                                               | <i>F. nucleatum</i> | <i>F. nucleatum</i> 25586 $\Delta$ <i>galKT fap2</i> In-frame deletion of <i>fap2</i> in the TNVT2501 background                                                                                                                                                                                                         | This study                         |

|          |                     |                                                                                                                                           |            |
|----------|---------------------|-------------------------------------------------------------------------------------------------------------------------------------------|------------|
| TNVT2503 | <i>F. nucleatum</i> | <i>F. nucleatum</i> 25586 $\Delta galKT fadA$<br>In-frame deletion of <i>fadA</i> in the TNVT2501 background                              | This study |
| TNVT2508 | <i>F. nucleatum</i> | <i>F. nucleatum</i> 25586 $\Delta galKT \Delta fadA arsB::FLAG-fadA$<br>Complementation strain of $\Delta fadA$ . (Cmr, Tm <sup>r</sup> ) | This study |

Cm<sup>r</sup>, Chloramphenicol resistance Tm<sup>r</sup>, Thiamphenicol resistance.

19  
20  
21

**Table S5. DNA oligonucleotides (primers) used in this study**

| Primer Name | Sequence (5' to 3')                                                    | Description                                                                                                                                                                                            |
|-------------|------------------------------------------------------------------------|--------------------------------------------------------------------------------------------------------------------------------------------------------------------------------------------------------|
| prDJSVT1220 | GTGGAGGAGCAGGCTATATTGGTAGCGATGTTGT<br>TAAATATTTGTTAG                   | Forward Quikchange primer to remove CATG site 1<br>from pDJSVT13 to make pDJSVT21                                                                                                                      |
| prDJSVT1221 | CTAACAAATATTTAACAAACATCGCTACCAATATAG<br>CCTGCTCCTCCAC                  | Reverse Quikchange primer to remove CATG site 1<br>from pDJSVT13 to make pDJSVT21                                                                                                                      |
| prDJSVT1222 | CTTGCATAAGAGACTATATTGATGTAATGGACTTA<br>GCAGATGCTCATTATC                | Forward Quikchange primer to remove CATG site 2<br>from pDJSVT13 to make pDJSVT21                                                                                                                      |
| prDJSVT1223 | GATAATGAGCATCTGCTAAGTCCATTACATCAATA<br>TAGTCTCTTATGCAAG                | Reverse Quikchange primer to remove CATG site 2<br>from pDJSVT13 to make pDJSVT21                                                                                                                      |
| prDJSVT1224 | GTGTACCTTGTACATACAGTATGACCGTTAAAGT<br>GGATATCAC                        | Forward Quikchange primer to remove CATG site 3<br>from pDJSVT13 to make pDJSVT21                                                                                                                      |
| prDJSVT1225 | GTGATATCCACTTTAACGGTCATACTGTATGTACA<br>AGGTACAC                        | Reverse Quikchange primer to remove CATG site 3<br>from pDJSVT13 to make pDJSVT21                                                                                                                      |
| prDJSVT1226 | GAAGATCCTTTTTGATAATCTGATGACCAAATCC<br>CTTAACGTGAG                      | Forward Quikchange primer to remove CATG site 4<br>from pDJSVT13 to make pDJSVT21                                                                                                                      |
| prDJSVT1227 | CTCACGTTAAGGGATTTTGGTCATCAGATTATCAA<br>AAAGGATCTC                      | Reverse Quikchange primer to remove CATG site 4<br>from pDJSVT13 to make pDJSVT21                                                                                                                      |
| prDJSVT1068 | CTGAGATCTAGATTTACAGCTAGCTCAGTCC                                        | Forward primer to clone <i>Fnn</i> 23726 <i>m.fnn23.I</i> gene<br>from synthetic codon optimized DNA into pET16b<br>under a constitutive promoter. Has <i>XbaI</i> . To make<br>pDJSVT24 and pDJSVT26  |
| prDJSVT1069 | GACTCTCCATGGAAATAATAAAAAAGCCGGATTA<br>ATAATCTG                         | Reverse primer to clone <i>Fnn</i> 23726 <i>m.fnn23.I</i> gene<br>from synthetic codon optimized DNA into pET16b<br>under a constitutive promoter. Has <i>NcoI</i> . To make<br>pDJSVT24 and pDJSVT26  |
| prDJSVT1070 | CTGAGACCATGGTTTACAGCTAGCTCAGTCC                                        | Forward primer to clone <i>Fnn</i> 23726 <i>m.fnn23.II</i> gene<br>from synthetic codon optimized DNA into pET16b<br>under a constitutive promoter. Has <i>NcoI</i> . To make<br>pDJSVT25 and pDJSVT26 |
| prDJSVT1071 | GACTCTCATATGAAATAATAAAAAAGCCGGATTAA<br>TAATCTG                         | Reverse primer to clone <i>Fnn</i> 23726 <i>m.fnn23.II</i> gene<br>from synthetic codon optimized DNA into pET16b<br>under a constitutive promoter. Has <i>NdeI</i> . To make<br>pDJSVT25 and pDJSVT26 |
| prDJSVT1076 | GCACTACCCATGGGAAACTATATCGGCAGCAAAT<br>TAAGtTAAAAAG                     | Forward primer to clone <i>Fnn</i> 23726 <i>m.fnn23.I</i> gene<br>from synthetic codon optimized DNA into pET16b<br>under IPTG promoter. Has <i>NcoI</i> . To make pDJSVT27                            |
| prDJSVT1077 | GCTAGTCTCGAGTTAgtgatggtgatggtgatgTTTCTTAA<br>TCAGGCAATGCAGATATTC       | Reverse primer to clone <i>Fnn</i> 23726 <i>m.fnn23.I</i> gene<br>from synthetic codon optimized DNA into pET16b<br>under IPTG promoter. Has <i>6xHis</i> and <i>XhoI</i> . To make<br>pDJSVT27        |
| prDJSVT1078 | GCACTACCCATGGGAGAAAATCTGAAATTGTTCC<br>TCGATG                           | Forward primer to clone <i>Fnn</i> 23726 <i>m.fnn23.II</i> gene<br>from synthetic codon optimized DNA into pET16b<br>under IPTG promoter. Has <i>NcoI</i> . To make pDJSVT28                           |
| prDJSVT1079 | GCTAGTCTCGAGTTAgtgatggtgatggtgatgCATTCTT<br>CGGTGTTGTAGTTGGTC          | Reverse primer to clone <i>Fnn</i> 23726 <i>m.fnn23.II</i> gene<br>from synthetic codon optimized DNA into pET16b<br>under IPTG promoter. Has <i>6xHis</i> and <i>XhoI</i> . To make<br>pDJSVT28       |
| prAUT104    | GATCCCATGGGAAGTTATAAAGAAAAGATACTA<br>AGTTTATAAATGAAAATTTG              | Forward primer to clone <i>m.fnn25.I</i> from genomic DNA<br>into pET16b. Has <i>NcoI</i> site. To make pDJSVT29.                                                                                      |
| prAUT104    | GACTCCCTCGAGTTAATGATGATGATGATGATG<br>ATTTTTAATAAAGTCGTTTATTCTTGAATATGC | Reverse primer to clone <i>m.fnn25.I</i> from genomic DNA<br>into pET16b. Has <i>6XHis</i> and <i>XhoI</i> site. To make<br>pDJSVT29                                                                   |
| prAUT91     | GATCCCATGGGAATATATATTGATCCTCCATATA<br>ATACAGGAAAAG                     | Forward primer to clone <i>m.fnn25.IV</i> from genomic<br>DNA into pET16b. Has <i>NcoI</i> site. To make pDJSVT30.                                                                                     |

|            |                                                                                           |                                                                                                                                 |
|------------|-------------------------------------------------------------------------------------------|---------------------------------------------------------------------------------------------------------------------------------|
| prAUT92    | GACTCCCTCGAGTTAATGATGATGATGATGATGATGATG<br>ATACTTCTAATTTCACTTATTCCAACCTTG                 | Reverse primer to clone <i>m.fnn25.VI</i> from genomic DNA into pET16b. Has <b>6XHis</b> and <b>XhoI</b> site. To make pDJSVT30 |
| prAUT93    | GACTCCCCATGGGAGAAAACTAAATGGAACAAG<br>CATGG                                                | Forward primer to clone <i>m.fnn25.V</i> from genomic DNA into pET16b. Has <b>NcoI</b> site. To make pDJSVT31.                  |
| prAUT94    | GGATCCCTCGAGTTAATGATGATGATGATGATGATGATG<br>ATACTCCTAATTTCACTTATTCCAACCTTG                 | Reverse primer to clone <i>m.fnn25.V</i> from genomic DNA into pET16b. Has <b>6XHis</b> and <b>XhoI</b> site. To make pDJSVT31  |
| prTN17     | GATCGCGGTACCGTAGTTATAGCTATATTTTATCC<br>ATTTGTAGGAGC                                       | Forward primer -750 bp upstream of <i>fap2</i> in <i>Fnn</i> 25586. Has a <b>KpnI</b> site. Makes construct pTNVT2501           |
| prTN18     | CTATATACACTAGGGTTAGTGCTAATTTAATTATA<br>AAGTGGTGCACCTTGGTGCTG                              | Reverse primer -1 bp upstream of <i>fap2</i> in <i>Fnn</i> 25586. Overlaps with prTN19 for OLE-PCR. Makes construct pTNVT2501   |
| prTN19     | CTTTATAATTAATAGCACTAACCCCTAGTGATATA<br>TAG                                                | Forward primer +1 bp downstream of <i>fap2</i> in <i>Fnn</i> 25586. Overlaps with prTN18 for OLE-PCR. Makes construct pTNVT2501 |
| prTN20     | GATCGCACGCGTCTAAAAAATTTGTATTTTCTA<br>GTAGACCTAAAAATTC                                     | Reverse primer +750 bp downstream of <i>fap2</i> in <i>Fnn</i> 25586. Has an <b>MluI</b> site. Makes construct pTNVT2501        |
| prTN21     | GAAAATTCAATTTTGGAACTACTGGAACCTTTATTT<br>ATTG                                              | Forward gene deletion confirmation primer -1000 bp upstream of <i>fap2</i> in <i>Fnn</i> 25586                                  |
| prTN22     | CTTCTTCAAATAATGAACATACATTTGCATTTG                                                         | Reverse gene deletion confirmation primer +1000 bp downstream of <i>fap2</i> in <i>Fnn</i> 25586                                |
| prTN23     | GATAAAGATGCTGGAAAAATACTATTCCAG                                                            | Forward sequencing primer -250 bp upstream of <i>fap2</i> <i>Fnn</i> 25586                                                      |
| prTN24     | CTTTATTTCTTGCTTGTCTAAATACTTTTAATTT<br>C                                                   | Reverse sequencing primer +250 bp upstream of <i>fap2</i> <i>Fnn</i> 25586                                                      |
| prTN49     | GATCGCGGTACCCCTATTAATAAAAAGCAAAA<br>GAAGCTCAATATACAAATTATG                                | Forward primer -750 bp upstream of <i>fadA</i> in <i>Fnn</i> 25586. Has a <b>KpnI</b> site. Makes construct pTNVT2502           |
| prTN50     | GGTTTTATTTTCATGCTAGCATTTTTCAAAT<br>TTATTTTGTACCTCCAAATTAAATTATAAT<br>AAATTATTTCTTATATTGAC | Reverse primer -1 bp upstream of <i>fadA</i> in <i>Fnn</i> 25586. Overlaps with prTN51 for OLE-PCR. Makes construct pTNVT2502   |
| prTN51     | TAAATTTTGAATAATGCTAGCATGAAATA<br>AAACC                                                    | Forward primer +1 bp downstream of <i>fadA</i> in <i>Fnn</i> 25586. Overlaps with prTN50 for OLE-PCR. Makes construct pTNVT2502 |
| prTN52     | GATCGCACGCGTGCATAATCAAGTCCTGTATT<br>GGCATTATTTAAG                                         | Reverse primer +750 bp downstream of <i>fadA</i> in <i>Fnn</i> 25586. Has an <b>MluI</b> site. Makes construct pTNVT2502        |
| prTN53     | GCAAAAATAAAAATATTATAAAAGTAGAG<br>AGAAACTCTTG                                              | Forward gene deletion confirmation primer -900 bp upstream of <i>fadA</i> in <i>Fnn</i> 25586                                   |
| prTN54     | CTTTCAAAGACAACATTGATGAATTAATA<br>TTGC                                                     | Reverse gene deletion confirmation primer +900 bp downstream of <i>fadA</i> in <i>Fnn</i> 25586                                 |
| prTN55     | CTTGCAAGATGTTAAAAGAAATATATTTGGGC                                                          | Forward sequencing primer -250 bp upstream of <i>fadA</i> in <i>Fnn</i> 25586                                                   |
| prTN56     | GCTACAACGTGAATTACAACGTCATAAAAC                                                            | Reverse sequencing primer +250 bp upstream of <i>fadA</i> in <i>Fnn</i> 25586                                                   |
| prTN89     | GTATTTGTACCATCACTTAAACTGGTATGTG                                                           | Reverse Internal primer in <i>fap2</i> used to confirm gene deletion in <i>Fnn</i> 25586. Used with prTNVT21                    |
| prDJSVT847 | GTAGGTGAATTACAAGCATTAGATGCTG                                                              | Forward primer of central region in <i>fadA</i> to confirm complementation in <i>Fnn</i> 25586                                  |
| prDJSVT848 | CCATTTTCAGATTCTAATTTCTTTAAAGCATC                                                          | Reverse primer of central region in <i>fadA</i> to confirm complementation in <i>Fnn</i> 25586                                  |

22  
23  
24  
25  
26  
27  
28  
29  
30  
31  
32

## REFERENCES

- 1 Casasanta, M. A. et al. *Fusobacterium nucleatum* host-cell binding and invasion induces IL-8 and CXCL1 secretion that drives colorectal cancer cell migration. *Sci Signal* **13**, doi:10.1126/scisignal.aba9157 (2020).
- 2 Kinder Haake, S., Yoder, S. & Gerardo, S. H. Efficient gene transfer and targeted mutagenesis in *Fusobacterium nucleatum*. *Plasmid* **55**, 27-38, doi:10.1016/j.plasmid.2005.06.002 (2006).

33 3 *Martinez-Garcia, E., Aparicio, T., de Lorenzo, V. & Nikel, P. I. New transposon tools tailored for*  
34 *metabolic engineering of gram-negative microbial cell factories. Front Bioeng Biotechnol* **2**, 46,  
35 *doi:10.3389/fbioe.2014.00046 (2014).*

36 4 *Andersen, K. R., Leksa, N. C. & Schwartz, T. U. Optimized E. coli expression strain LOBSTR*  
37 *eliminates common contaminants from His-tag purification. Proteins* **81**, 1857-1861,  
38 *doi:10.1002/prot.24364 (2013).*

39 5 *Anton, B. P. et al. Complete Genome Sequence of ER2796, a DNA Methyltransferase-Deficient*  
40 *Strain of Escherichia coli K-12. PLoS One* **10**, e0127446, *doi:10.1371/journal.pone.0127446 (2015).*

41 6 *Manson McGuire, A. et al. Evolution of invasion in a diverse set of Fusobacterium species. mBio* **5**,  
42 *e01864, doi:10.1128/mBio.01864-14 (2014).*

43
